# Supplementary material for: Communication about vaccine efficacy and COVID-19 vaccine choice: Evidence from a survey experiment in the United States
Source: PubMed Central journal article supplement (PMC8967042; doi:10.1371/journal.pone.0265011), 2022-03-30
Supplement: pone.0265011.s001.pdf [file pone.0265011.s001.pdf]

### Supplementary Table S1: Comparative Demographics

|                     | Lucid Sample | 2020 ANES | 2018 GSS | US Census |
|---------------------|--------------|-----------|----------|-----------|
| <i>Demographics</i> |              |           |          |           |
| Black               | 13%          | 9%        | 16%      | 13%       |
| Latino              | 9%           | 9%        | 6%       | 18%       |
| Female              | 52%          | 54%       | 55%      | 51%       |
| % College degree    | 38%          | 45%       | 33%      | 32%       |
| Median age          | 43 years     | 52 years  | 48 years | 38 years  |

*Note:* Comparisons are made between our survey sample and the 2020 American National Election Study and 2018 General Social Survey. All Census figures taken from the 2018 American Community Survey.
