# Supplementary material for: Communication about vaccine efficacy and COVID-19 vaccine choice: Evidence from a survey experiment in the United States
Source: PubMed Central journal article supplement (PMC8967042; doi:10.1371/journal.pone.0265011), 2022-03-30

A

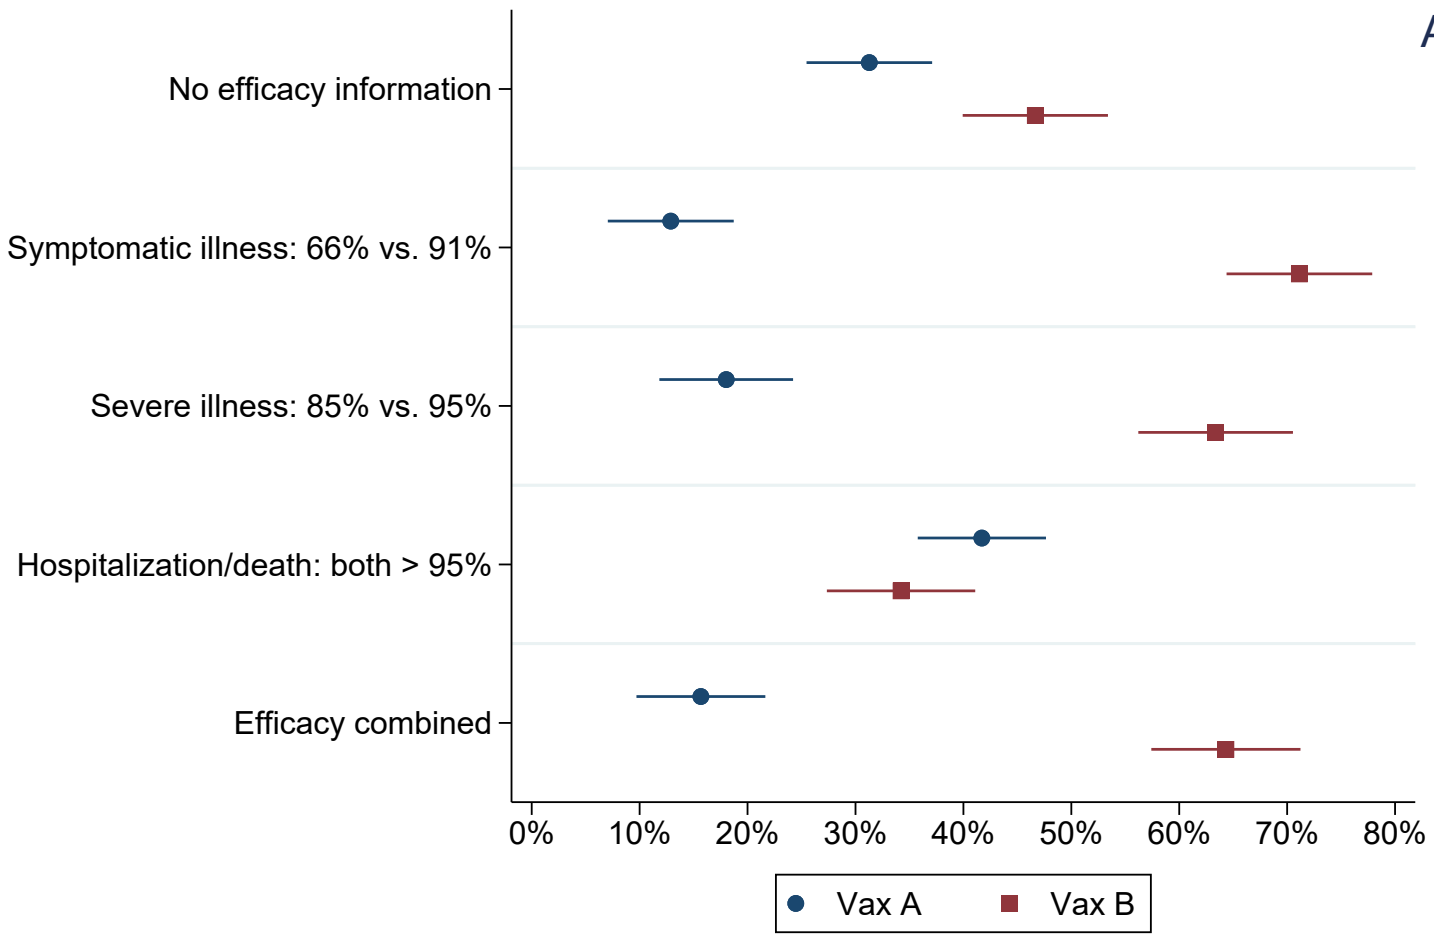

B

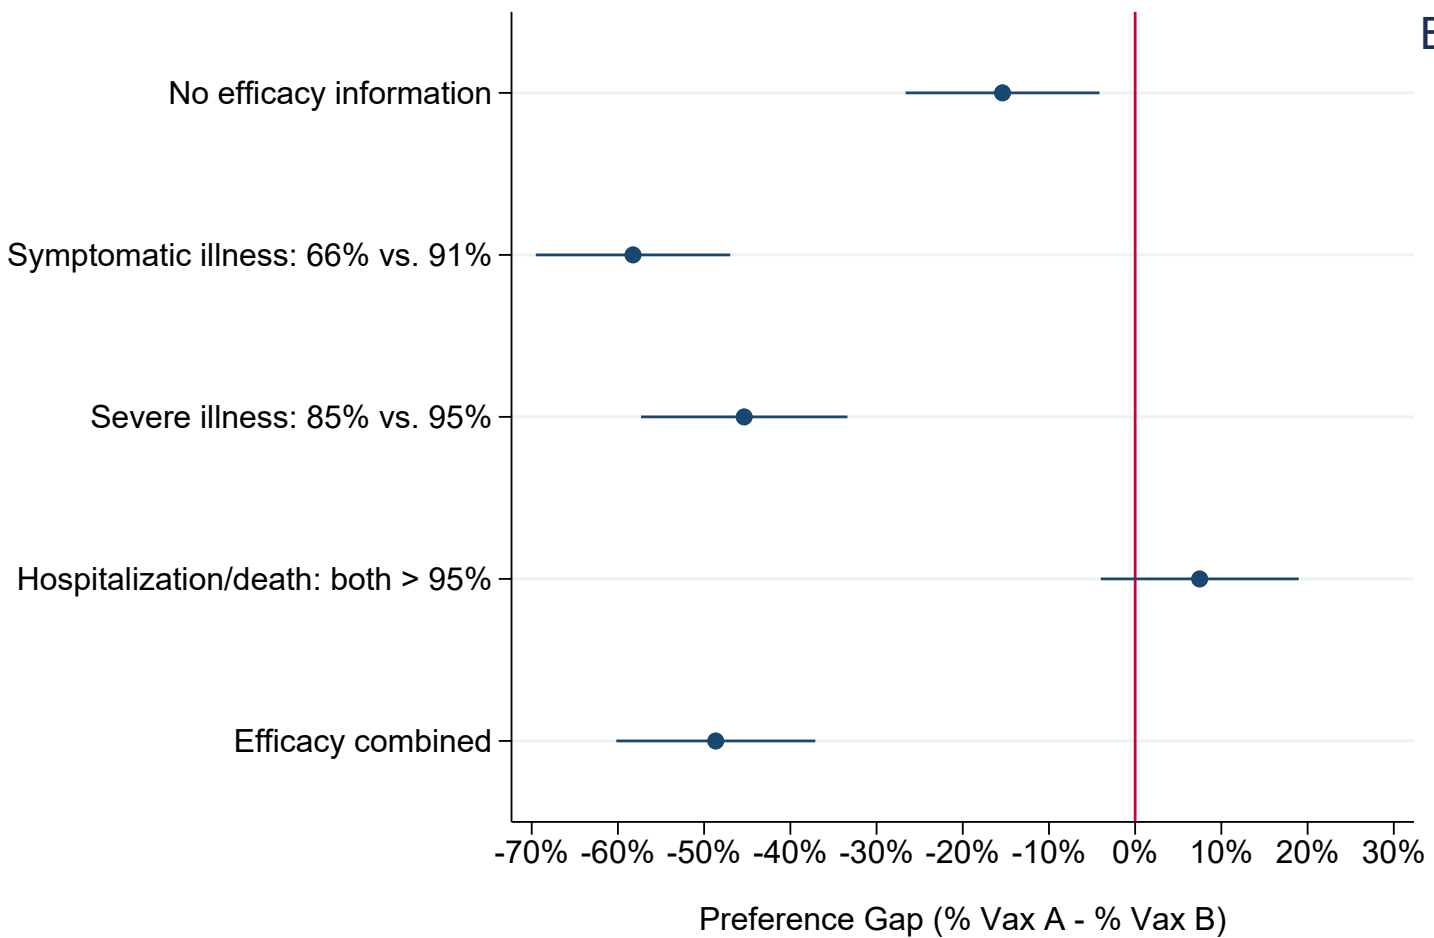

Supplement: pone.0265011.s003.pdf [file pone.0265011.s003.pdf]
